# Supplementary material for: C57BL/6N Albino/Agouti Mutant Mice as Embryo Donors for Efficient Germline Transmission of C57BL/6 ES Cells
Source: PubMed Central journal article supplement (PMC3944090; doi:10.1371/journal.pone.0090570), 2014-03-05
Supplement: pone.0090570.s001.pdf [file pone.0090570.s001.pdf]

## Figure S1 SNP Analysis

| SNP              | Chr | Position  | C57BL/6NTac | albino A++ | C57BL6/J |
|------------------|-----|-----------|-------------|------------|----------|
| Mus-Ptprc        | 1   | 52665170  | C           | C          | C        |
| rs13476148       | 1   | 142911628 | A           | A          | C        |
| CEL-2 23847726   | 2   | 23847726  | C           | C          | A        |
| rs13476554       | 2   | 67180899  | T           | T          | A        |
| rs13477019       | 3   | 23589162  | A           | A          | T        |
| Mus-Tyrp1B       | 4   | 80481305  | G           | G          | G        |
| rs13477622       | 4   | 28491198  | G           | G          | A        |
| rs3662161        | 5   | 114905705 | G           | G          | A        |
| rs13478783       | 6   | 60682681  | G           | G          | A        |
| rs13478995       | 6   | 117862153 | C           | C          | G        |
| Mus-TyrC         | 7   | 94641553  | G           | C          | G        |
| rs13479522       | 7   | 116540646 | G           | G          | A        |
| rs13480100       | 9   | 21200544  | G           | G          | A        |
| rs13480122       | 9   | 31136193  | G           | G          | A        |
| rs13480619       | 10  | 57805922  | G           | G          | A        |
| rs29359333       | 10  | 57796761  | T           | T          | C        |
| rs13480759       | 10  | 109059096 | A           | A          | G        |
| rs13481014       | 11  | 47757117  | G           | G          | A        |
| rs13481573       | 12  | 82237479  | A           | A          | G        |
| rs13481634       | 12  | 101558810 | C           | C          | A        |
| rs13481734       | 13  | 26416832  | G           | G          | A        |
| CEL-14 116404928 | 14  | 116404928 | A           | A          | G        |
| rs4165065        | 16  | 17188907  | G           | G          | A        |
| rs13483055       | 17  | 58655424  | G           | G          | A        |
| rs13483237       | 18  | 19671420  | G           | G          | C        |

SNP confirmation of the C57BL/6NTac substrain identity of Albino A++ (blue), compared to C57BL/6J (red). The gene-targeted *Tyr* nucleotide exchange from G to C resulting in a C103S amino acid substitution in Albino A++ is highlighted.
