# Supplementary material for: C57BL/6N Albino/Agouti Mutant Mice as Embryo Donors for Efficient Germline Transmission of C57BL/6 ES Cells
Source: PubMed Central journal article supplement (PMC3944090; doi:10.1371/journal.pone.0090570), 2014-03-05
Supplement: pone.0090570.s003.pdf [file pone.0090570.s003.pdf]

**Supplementary Table S2** | Coat color detection and genotype schemes of different Albino host <-> ES cell and chimera <-> C57BL/6 (a) or Albino host strain (b) mating partner combinations. Only (non-)agouti and tyrosinase coat color alleles are considered.

- I) Albino A++ (C57BL/6NTac- $A^{tm1.1Arte}Tyr^{tm1Arte}$ ), 100% recognition of GLT transmission by coat color with combinations 1a, 1b and 2b, note transmission of the  $A^{tm1.1}$  and  $Tyr^{tm1}$  allele with 1b and 2b.
- II) Albino (C57BL/6NTac- $A^{tm1.1Arte}$ ), 100% recognition of GLT transmission by coat color only with combination 1b, note transmission of the  $Tyr^{tm1}$  allele.

| I) Albino A++ host Strain: C57BL/6NTac- $A^{tm1.1Arte}Tyr^{tm1}$ (allele configuration: $A^{tm1.1}/A^{tm1.1}$ , $Tyr^{tm1}/Tyr^{tm1}$ ) |                                                        |                                                                                                              |                                                                  |                                                                  |                                                                                                            |                                            |
|-----------------------------------------------------------------------------------------------------------------------------------------|--------------------------------------------------------|--------------------------------------------------------------------------------------------------------------|------------------------------------------------------------------|------------------------------------------------------------------|------------------------------------------------------------------------------------------------------------|--------------------------------------------|
|                                                                                                                                         | ES cell                                                | Chimera Coat Color                                                                                           | Mating Partner                                                   | Offspring<br>Non-Germline                                        | Offspring<br>Germline                                                                                      |                                            |
| 1a                                                                                                                                      | B6.3-6, JM8,<br>C57BL/6NTac<br>(a/a, Tyr/Tyr)          | C57BL/6NTac + C57BL/6NTac<br>( $A^{tm1.1}/A^{tm1.1}$ , $Tyr^{tm1}/Tyr^{tm1}$ ) + (a/a, Tyr/Tyr)              | C57BL/6NTac<br>(a/a, Tyr/Tyr)                                    | C57BL/6NTac<br>( $A^{tm1.1}/a$ , $Tyr^{tm1}/Tyr$ )               | C57BL/6NTac<br>(a/a, Tyr/Tyr)                                                                              |                                            |
| 1b                                                                                                                                      | B6.3-6, JM8,<br>C57BL/6NTac<br>(a/a, Tyr/Tyr)          | C57BL/6NTac + C57BL/6NTac<br>( $A^{tm1.1}/A^{tm1.1}$ , $Tyr^{tm1}/Tyr^{tm1}$ ) + (a/a, Tyr/Tyr)              | C57BL/6NTac<br>( $A^{tm1.1}/A^{tm1.1}$ , $Tyr^{tm1}/Tyr^{tm1}$ ) | C57BL/6NTac<br>( $A^{tm1.1}/A^{tm1.1}$ , $Tyr^{tm1}/Tyr^{tm1}$ ) | C57BL/6NTac<br>(a/ $A^{tm1.1}$ ), $Tyr/Tyr^{tm1}$ )                                                        |                                            |
| 2a                                                                                                                                      | JM8A.3<br>(C57BL/6NTac)<br>( $A^{tm1Brd}/a$ , Tyr/Tyr) | C57BL/6NTac + C57BL/6NTac<br>( $A^{tm1.1}/A^{tm1.1}$ , $Tyr^{tm1}/Tyr^{tm1}$ ) + ( $A^{tm1Brd}/a$ , Tyr/Tyr) | C57BL/6NTac<br>(a/a, Tyr/Tyr)                                    | C57BL/6NTac<br>( $A^{tm1.1}/a$ , $Tyr^{tm1}/Tyr$ )               | C57BL/6NTac<br>(a/a, Tyr/Tyr)                                                                              | C57BL/6NTac<br>( $A^{tm1Brd}/a$ , Tyr/Tyr) |
| 2b                                                                                                                                      | JM8A.3<br>(C57BL/6NTac)<br>( $A^{tm1Brd}/a$ , Tyr/Tyr) | C57BL/6NTac + C57BL/6NTac<br>( $A^{tm1.1}/A^{tm1.1}$ , $Tyr^{tm1}/Tyr^{tm1}$ ) + ( $A^{tm1Brd}/a$ , Tyr/Tyr) | C57BL/6NTac<br>( $A^{tm1.1}/A^{tm1.1}$ , $Tyr^{tm1}/Tyr^{tm1}$ ) | C57BL/6NTac<br>( $A^{tm1.1}/A^{tm1.1}$ , $Tyr^{tm1}/Tyr^{tm1}$ ) | C57BL/6NTac<br>50% (a/ $A^{tm1.1}$ , $Tyr/Tyr^{tm1}$ )<br>50% ( $A^{tm1Brd}/A^{tm1.1}$ , $Tyr/Tyr^{tm1}$ ) |                                            |

| II) Albino host Strain: C57BL/6NTac- $Tyr^{tm1.1Arte}$ (allele configuration: a/a, $Tyr^{tm1}/Tyr^{tm1}$ ) |                                                        |                                                                                          |                                              |                                              |                                        |                                                     |
|------------------------------------------------------------------------------------------------------------|--------------------------------------------------------|------------------------------------------------------------------------------------------|----------------------------------------------|----------------------------------------------|----------------------------------------|-----------------------------------------------------|
|                                                                                                            | ES cell                                                | Chimera Coat Color                                                                       | Mating Partner                               | Offspring<br>Non-Germline                    | Offspring<br>Germline                  |                                                     |
| 1a                                                                                                         | B6.3-6, JM8,<br>C57BL/6NTac<br>(a/a, Tyr/Tyr)          | C57BL/6NTac + C57BL/6NTac<br>(a/a, $Tyr^{tm1}/Tyr^{tm1}$ ) + (a/a, Tyr/Tyr)              | C57BL/6NTac<br>(a/a, Tyr/Tyr)                | C57BL/6NTac<br>(a/a, $Tyr^{tm1}/Tyr$ )       | C57BL/6NTac<br>(a/a, Tyr/Tyr)          |                                                     |
| 1b                                                                                                         | B6.3-6, JM8,<br>C57BL/6NTac<br>(a/a, Tyr/Tyr)          | C57BL/6NTac + C57BL/6NTac<br>(a/a, $Tyr^{tm1}/Tyr^{tm1}$ ) + (a/a, Tyr/Tyr)              | C57BL/6NTac<br>(a/a, $Tyr^{tm1}/Tyr^{tm1}$ ) | C57BL/6NTac<br>(a/a, $Tyr^{tm1}/Tyr^{tm1}$ ) | C57BL/6NTac<br>(a/a, $Tyr/Tyr^{tm1}$ ) |                                                     |
| 2a                                                                                                         | JM8A.3<br>(C57BL/6NTac)<br>( $A^{tm1Brd}/a$ , Tyr/Tyr) | C57BL/6NTac + C57BL/6NTac<br>(a/a, $Tyr^{tm1}/Tyr^{tm1}$ ) + ( $A^{tm1Brd}/a$ , Tyr/Tyr) | C57BL/6NTac<br>(a/a, Tyr/Tyr)                | C57BL/6NTac<br>(a/a, $Tyr^{tm1}/Tyr$ )       | C57BL/6NTac<br>(a/a, Tyr/Tyr)          | C57BL/6NTac<br>( $A^{tm1Brd}/a$ , Tyr/Tyr)          |
| 2b                                                                                                         | JM8A.3<br>(C57BL/6NTac)<br>( $A^{tm1Brd}/a$ , Tyr/Tyr) | C57BL/6NTac + C57BL/6NTac<br>(a/a, $Tyr^{tm1}/Tyr^{tm1}$ ) + ( $A^{tm1Brd}/a$ , Tyr/Tyr) | C57BL/6NTac<br>(a/a, $Tyr^{tm1}/Tyr^{tm1}$ ) | C57BL/6NTac<br>(a/a, $Tyr^{tm1}/Tyr^{tm1}$ ) | C57BL/6NTac<br>(a/a, $Tyr/Tyr^{tm1}$ ) | C57BL/6NTac<br>( $A^{tm1Brd}/a$ , $Tyr/Tyr^{tm1}$ ) |
